# Supplementary material for: Effects of Land Cover on the Movement of Frugivorous Birds in a Heterogeneous Landscape
Source: PLOS journal article supplement (doi:10.1371/journal.pone.0156688), 2016-06-03
Supplement: S5 (10.1371/journal.pone.0156688.s005) [file journal.pone.0156688.s005]

**S1 Table. Individuals of *Turdus leucomelas* and *Turdus rufiventris* followed by radio telemetry from June 2013 to June 2014 in the city limits of Itatiba, São Paulo.**

| Individuals | Weigh (g) | Species                   | Sex    | Sample period            | Sample size<br>(Average speeds) | Sample size<br>(Turning angles) |
|-------------|-----------|---------------------------|--------|--------------------------|---------------------------------|---------------------------------|
| 1           | 89        | <i>Turdus rufiventris</i> | female | 29/11/2013               | 7                               | 6                               |
| 2           | 84        | <i>Turdus leucomelas</i>  | female | 22/02/2014 to 30/04/2014 | 93                              | 86                              |
| 3           | 69        | <i>Turdus leucomelas</i>  | male   | 18/07/2013 to 9/9/2013   | 25                              | 19                              |
| 4           | 98        | <i>Turdus rufiventris</i> | female | 05/05/2014 to 30/04/2014 | 27                              | 24                              |
| 5           | 83        | <i>Turdus leucomelas</i>  | female | 05/04/2014 to 30/04/2014 | 24                              | 23                              |
| 6           | 76        | <i>Turdus leucomelas</i>  | male   | 8/8/2013 to 15/12/2013   | 28                              | 21                              |
| 7           | 73        | <i>Turdus rufiventris</i> | male   | 24/06/2103 to 9/7/2013   | 37                              | 34                              |
| 8           | 78        | <i>Turdus rufiventris</i> | male   | 23/8/2013 to 25/8/2013   | 11                              | 9                               |
| 9           | 94        | <i>Turdus leucomelas</i>  | male   | 20/9/2013 to 15/11/2013  | 16                              | 14                              |
| 10          | 70        | <i>Turdus rufiventris</i> | male   | 22/02/2014 to 02/03/2014 | 7                               | 6                               |
|             |           |                           |        |                          | 275                             | 242                             |

The thrushes collected were tagged with radio transmitters, and a blood sample was collected for sex identification. The tracking period varied between individuals captured due to the limitations of radio telemetry in mountainous environments.
